# Supplementary material for: Like Will to Like: Abundances of Closely Related Species Can Predict Susceptibility to Intestinal Colonization by Pathogenic and Commensal Bacteria
Source: PubMed Central journal article supplement (PMC2796170; doi:10.1371/journal.ppat.1000711), 2010-01-08

Stecher, Chaffron, Käppeli et al. Figure S1

LCM and smCON mice develop inflammation of the cecum and colon after *S.Tm* infection

**A** naive CON

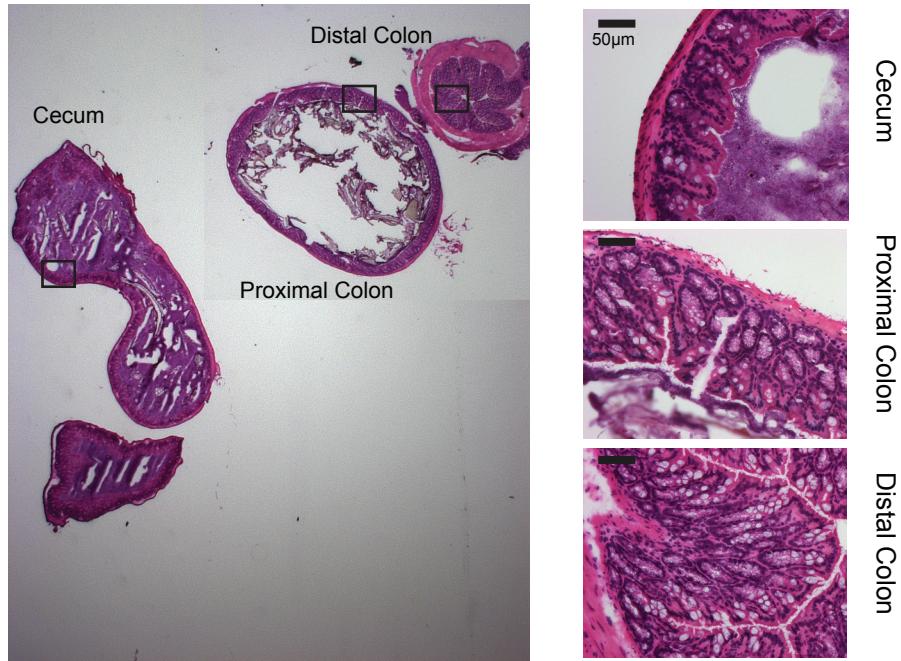

**B** smCON day 3 p.i. *S. Tm*

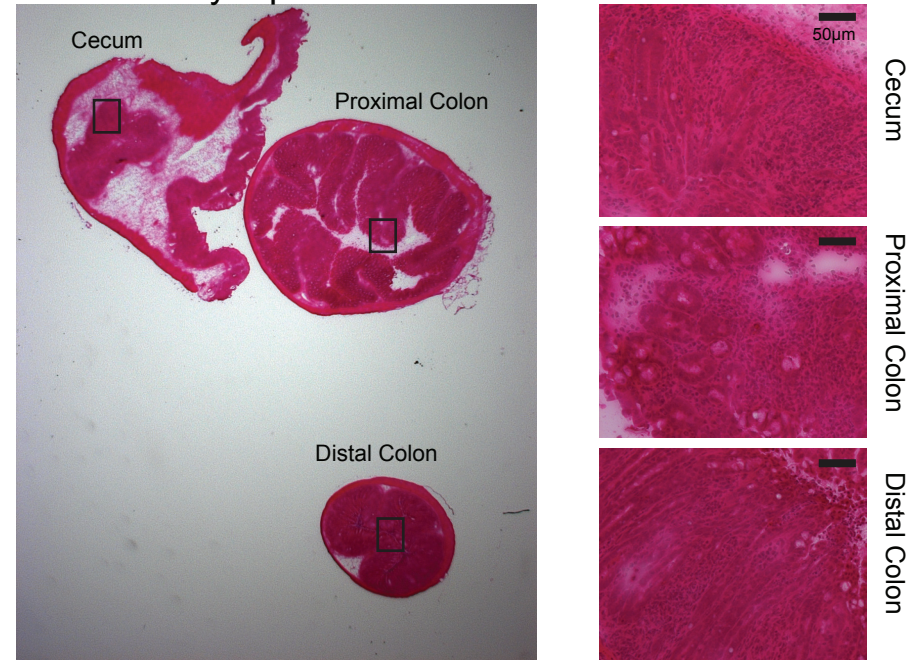

**C** LCM day 3 p.i. *S. Tm*

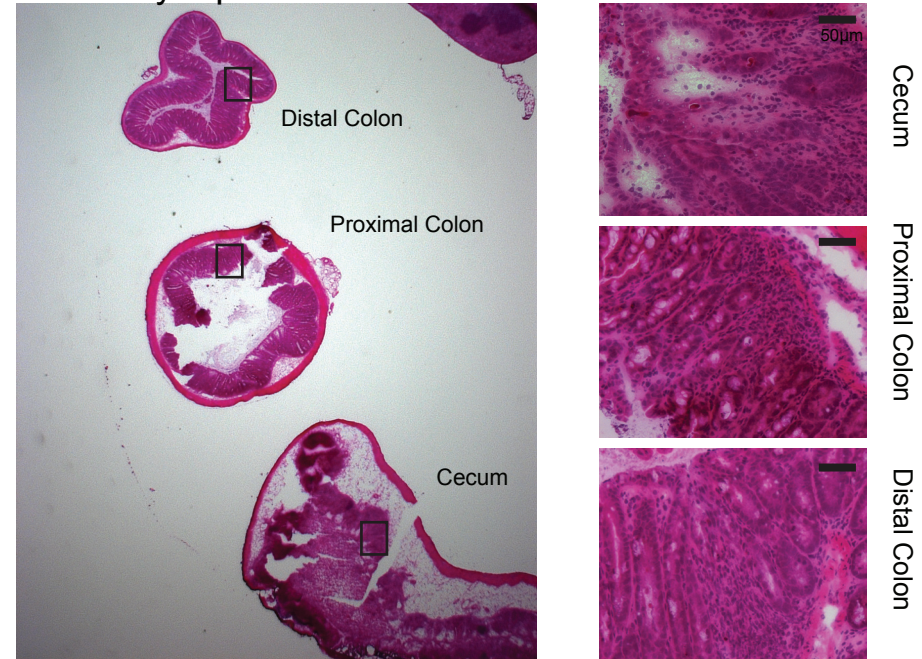

Supplement: ppat.1000711.s001.pdf [file ppat.1000711.s001.pdf]
