# Supplementary material for: Like Will to Like: Abundances of Closely Related Species Can Predict Susceptibility to Intestinal Colonization by Pathogenic and Commensal Bacteria
Source: PubMed Central journal article supplement (PMC2796170; doi:10.1371/journal.ppat.1000711), 2010-01-08

# Stecher, Chaffron, Käppeli et al. Figure S5

Detection of ASF strains by PCR

ASF356

ASF360

ASF361

ASF457

ASF492

ASF500

ASF502

ASF519

**A**

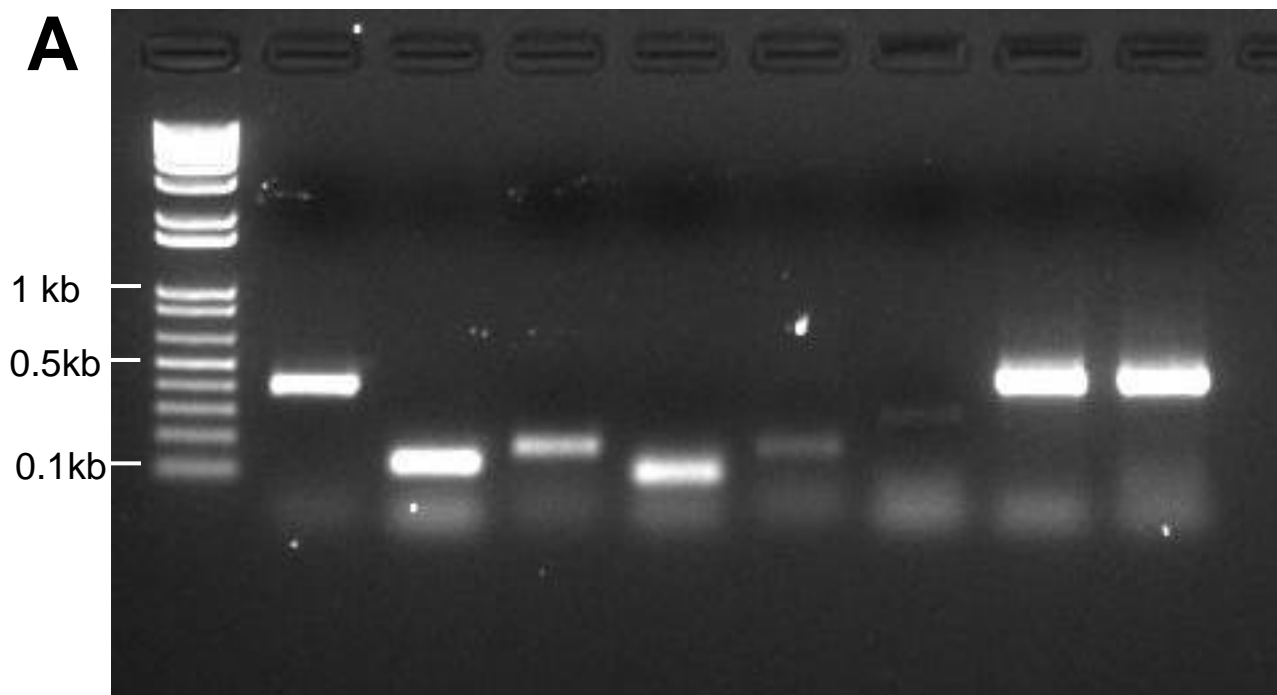

**B**

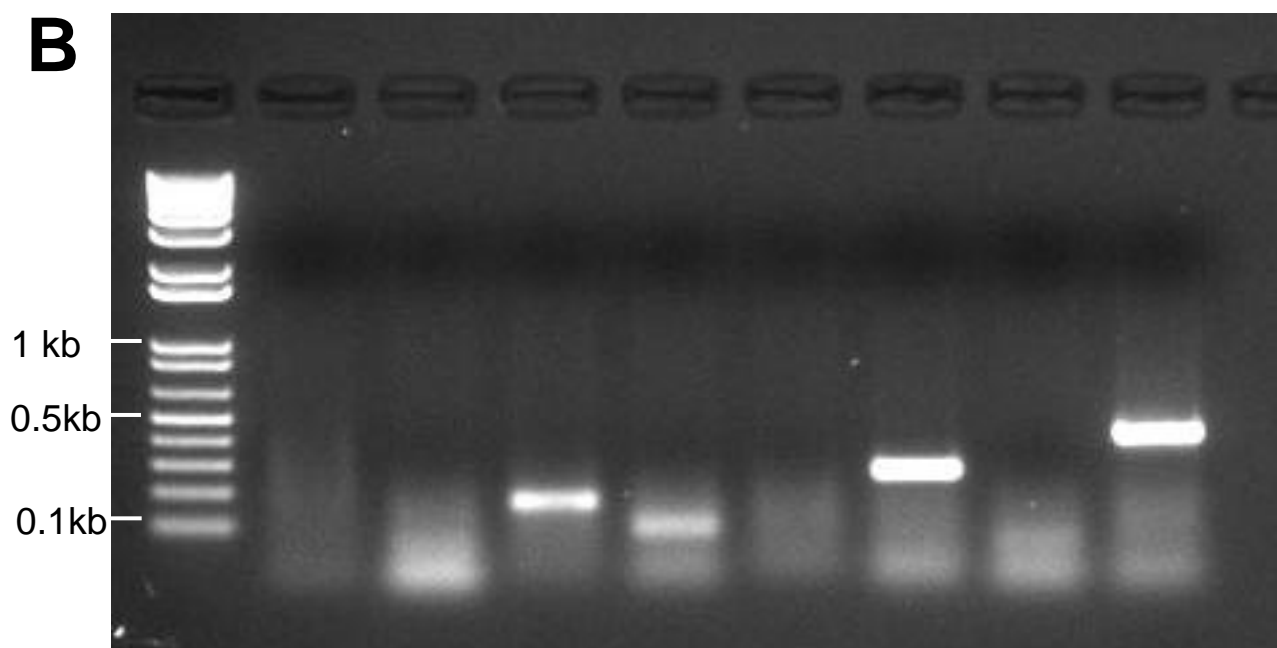

Supplement: ppat.1000711.s005.pdf [file ppat.1000711.s005.pdf]
