# Supplementary material for: Like Will to Like: Abundances of Closely Related Species Can Predict Susceptibility to Intestinal Colonization by Pathogenic and Commensal Bacteria
Source: PubMed Central journal article supplement (PMC2796170; doi:10.1371/journal.ppat.1000711), 2010-01-08

Qualitative microbiota analysis during re-association of LCM mice

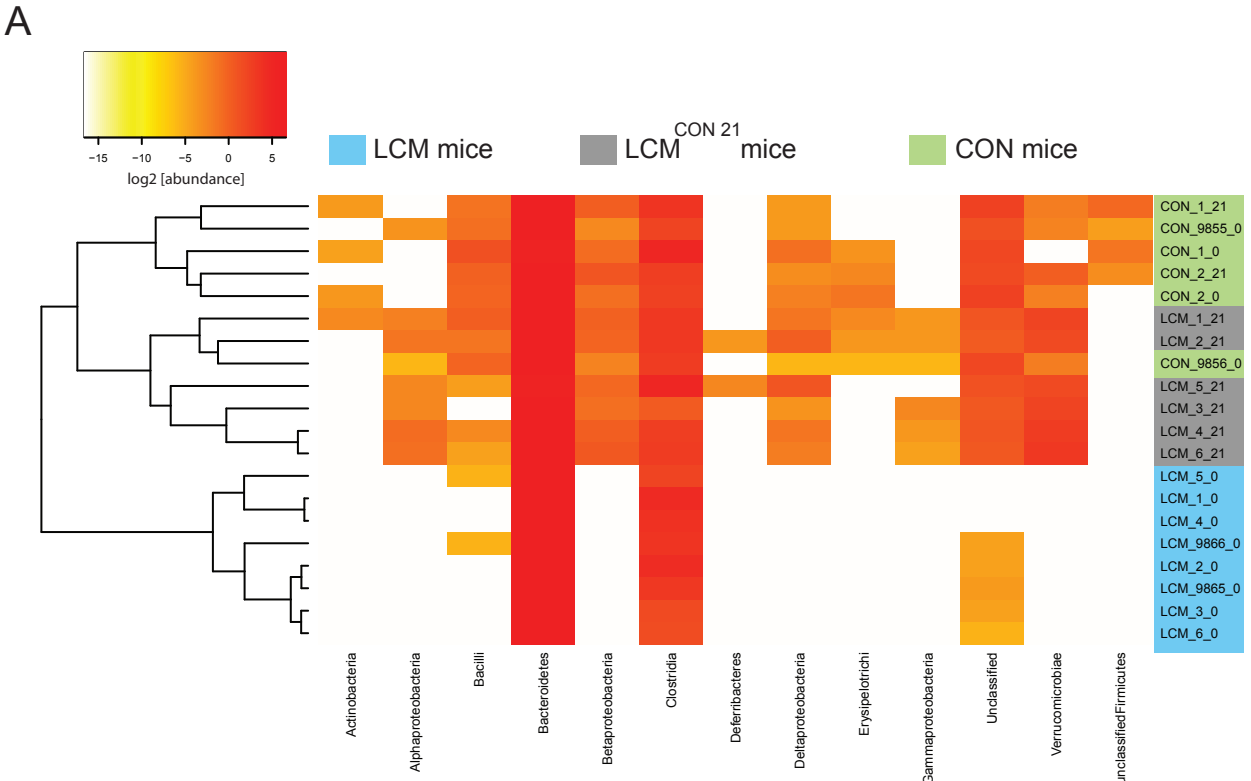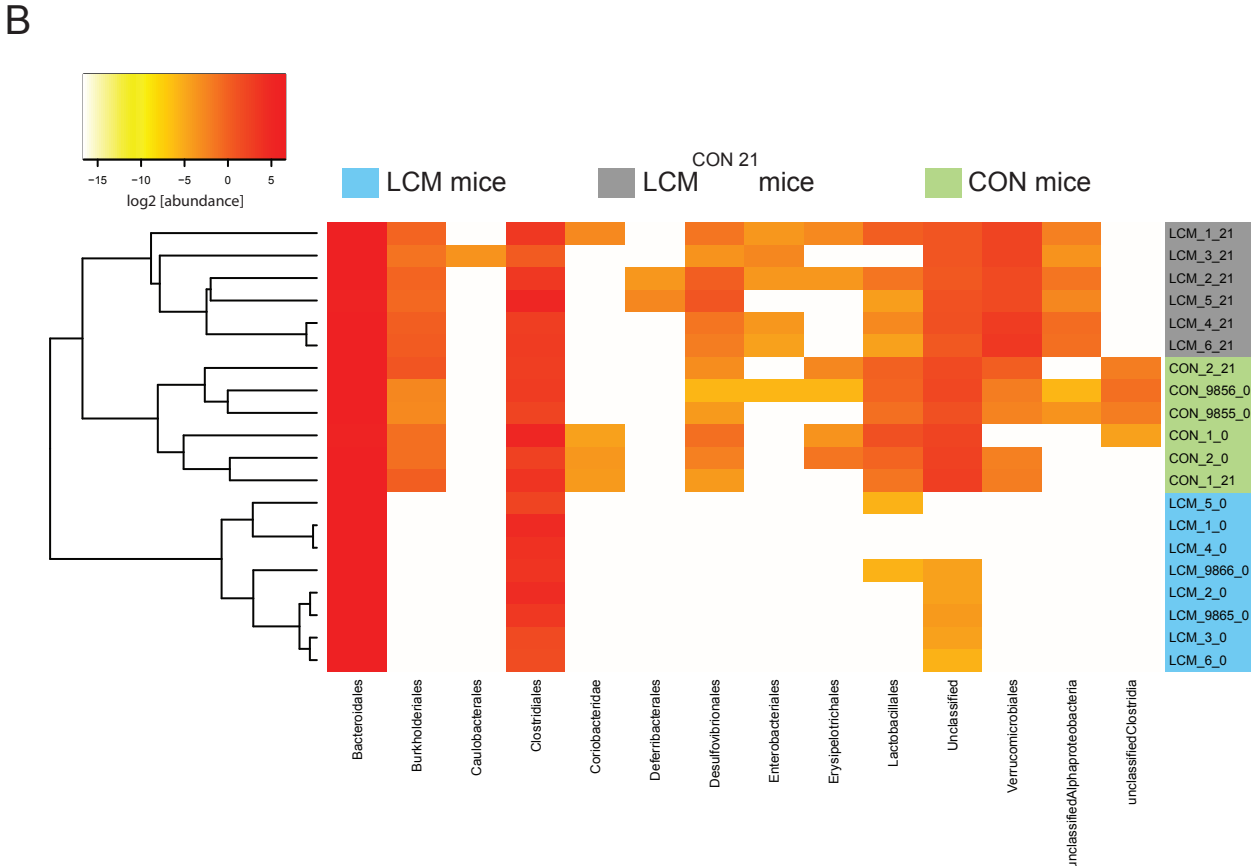

Supplement: ppat.1000711.s008.pdf [file ppat.1000711.s008.pdf]
